# Supplementary material
Source: Royal Society of Chemistry journal article supplement (doi:10.1039/d6ce00199h)
Supplement: d6ce00199h1.pdf [file d6ce00199h1.pdf]

## Supporting Information

# Two- and Three-Dimensional Nickel(II) and Copper(II) Metal– Organic Frameworks Based on 1*H*-Pyrazole-4-carboxylate

Shin-ichiro Takeshi, Liangcheng Lyu, Akane Hase, Nagito Haga, Rina Takano, Takayuki Ishida\*  
and Tamizo Kogane\*

*The Univ. of Electro-Communications, 1-5-1 Chofugaoka, Chofu, Tokyo, 182-8585, Japan*

*E-mail: takayuki.ishida@uec.ac.jp (T.I.), kogane@b-star.jp (T.K.)*

### Table of Contents

|                  |                                                                                                         |          |
|------------------|---------------------------------------------------------------------------------------------------------|----------|
| <b>Figure S1</b> | FT-IR spectra of <b>1</b> , <b>2</b> , <b>3</b> , <i>trans</i> - <b>4</b> , and <i>cis</i> - <b>4</b> . | p. S 2-3 |
| <b>Figure S2</b> | X-ray crystal structures of <i>trans</i> - and <i>cis</i> - <b>4</b> .                                  | p. S 4   |
| <b>Table S1</b>  | Crystallographic data of <i>trans</i> - and <i>cis</i> - <b>4</b> .                                     | p. S 5   |
| <b>Figure S3</b> | Hydrogen bonds in the crystals of <b>1</b> , <b>2</b> , and <b>3</b> .                                  | p. S 6   |
| <b>Figure S4</b> | Powder XRD profiles for <b>3</b> .                                                                      | p. S 7   |

(a)

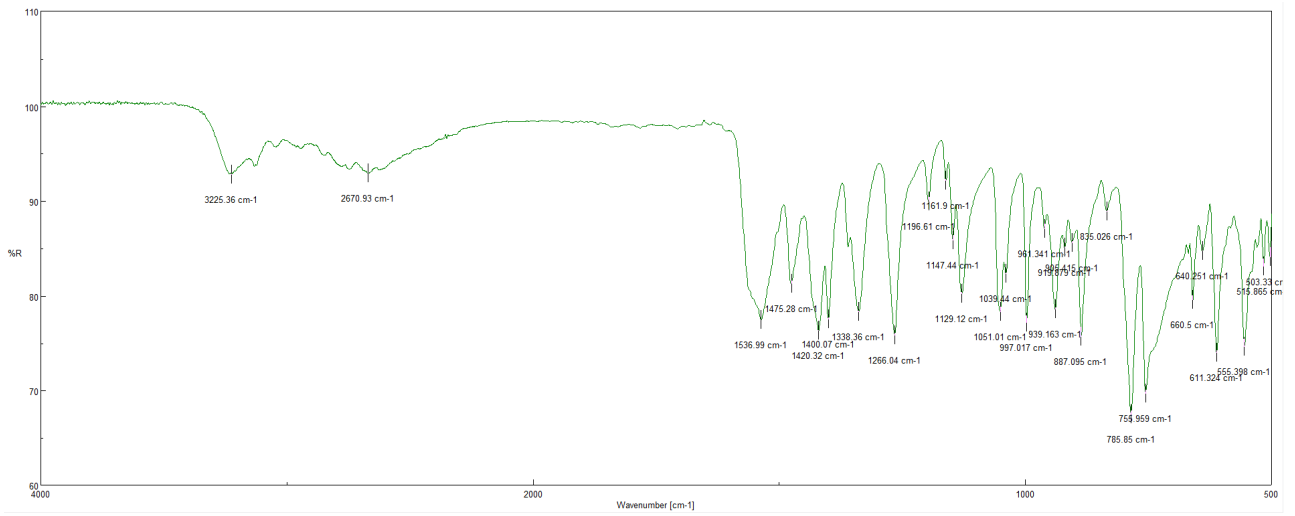

(b)

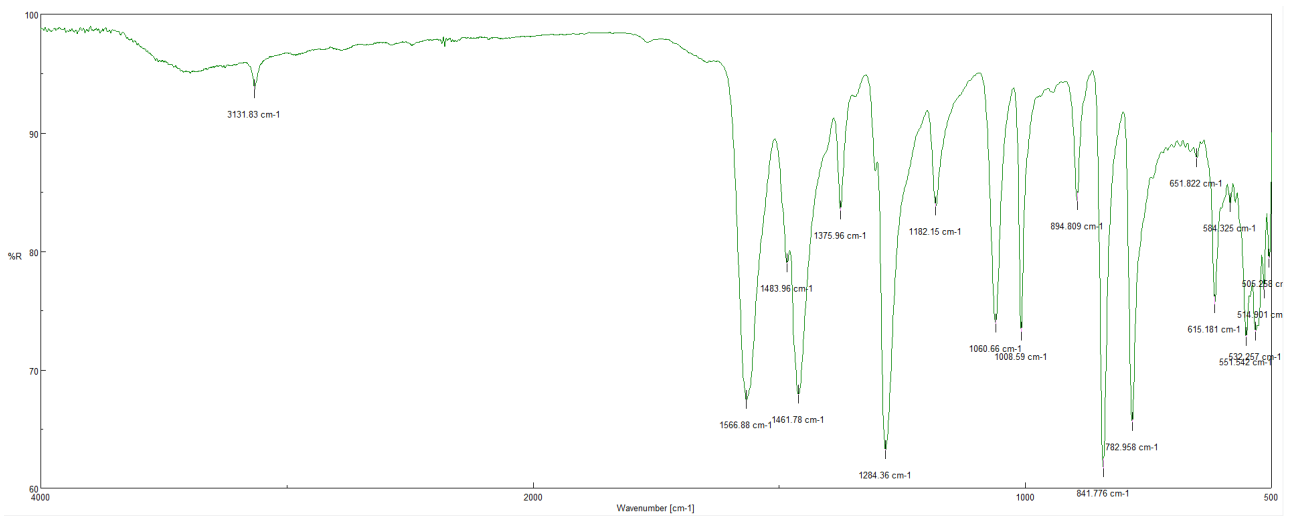

(c)

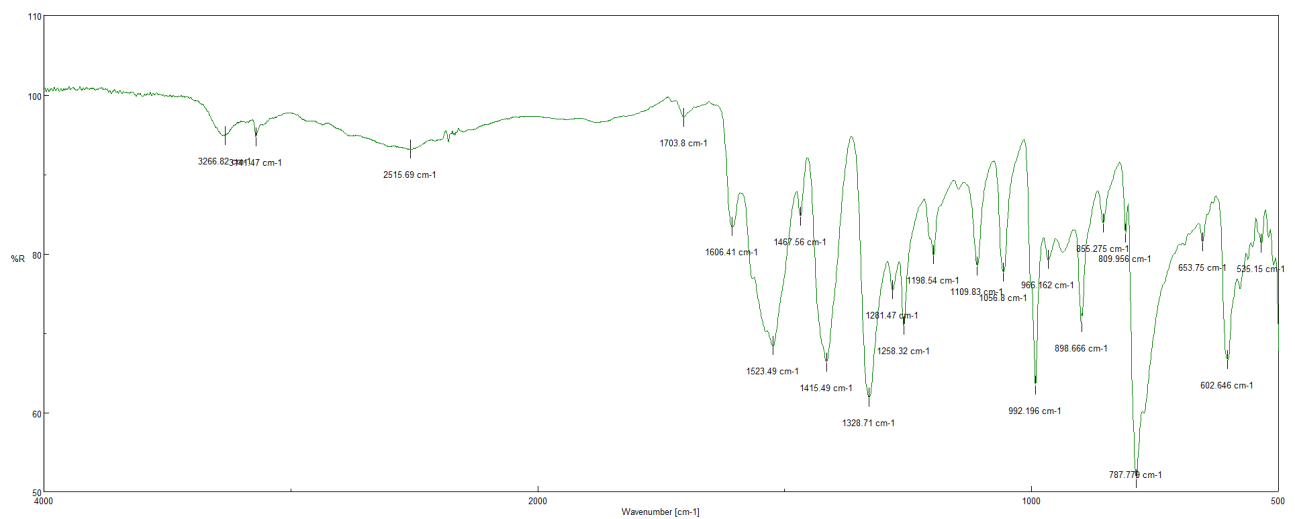

(d)

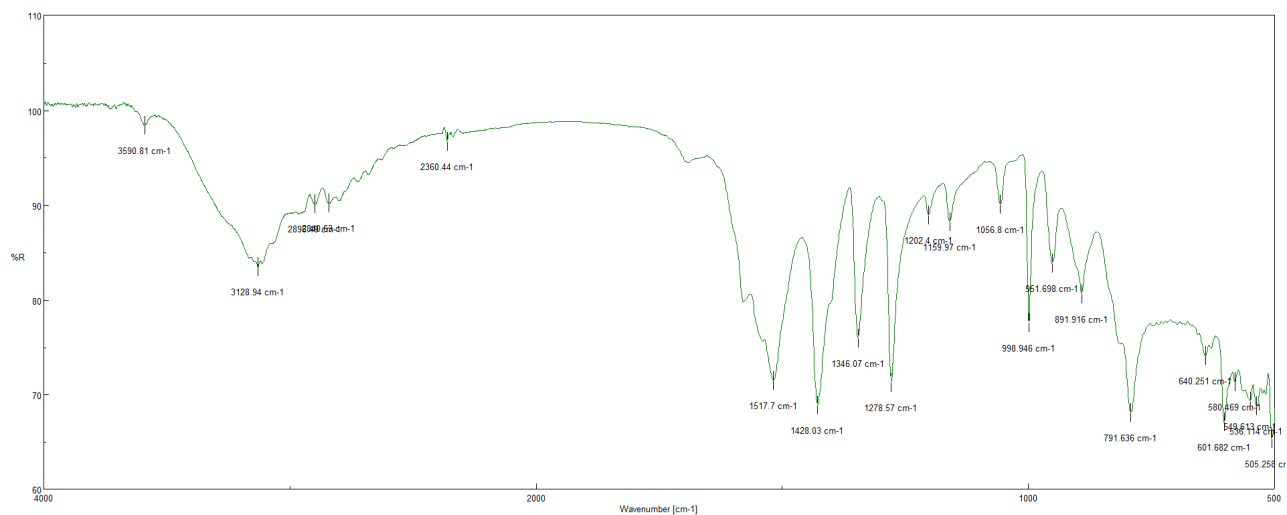

(e)

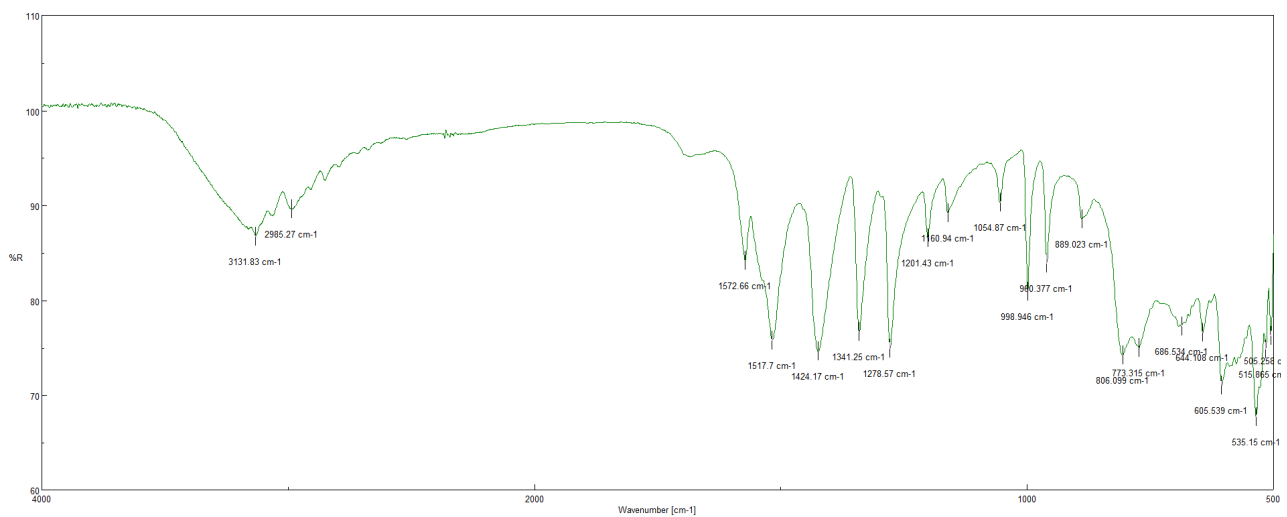

**Figure S1.** FT-IR spectra of (a) **1**, (b) **2**, (c) **3**, (d) *trans*-**4**, and (e) *cis*-**4**.

(a)

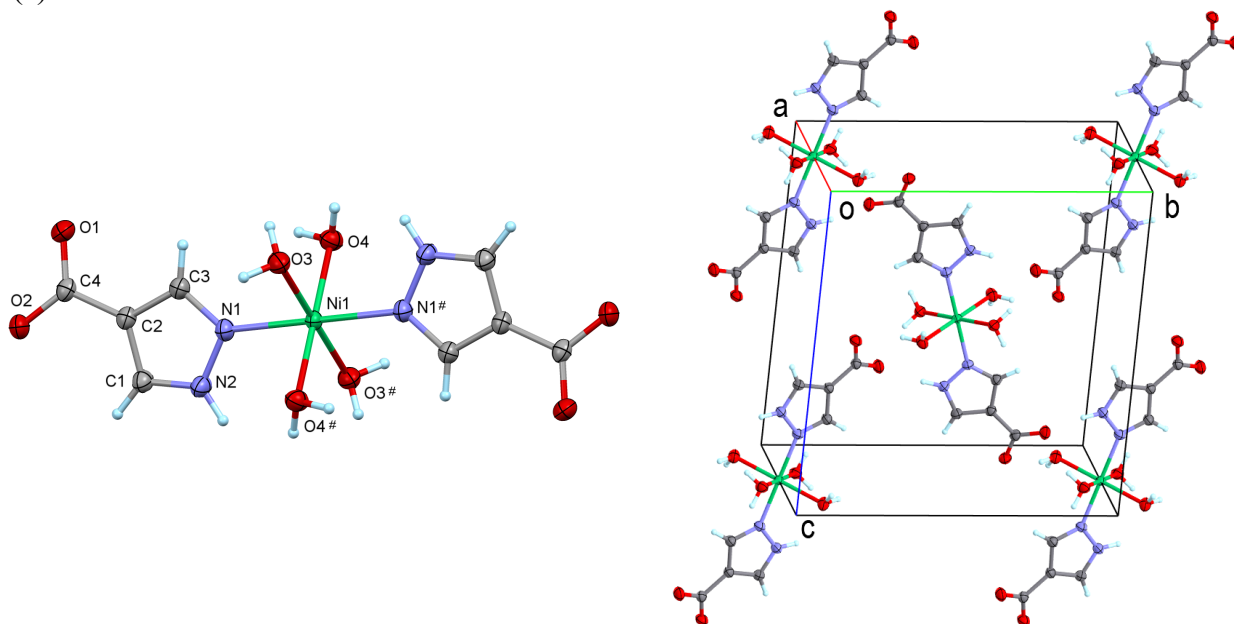

(b)

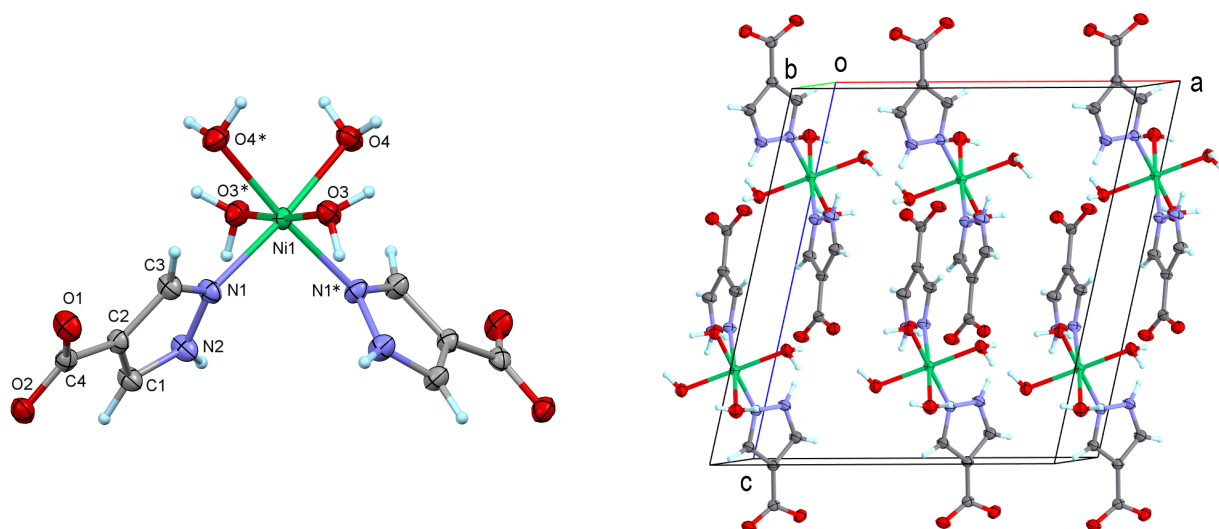

**Figure S2.** Molecular and crystal structures of (a) *trans*-4 and (b) *cis*-4. Thermal ellipsoids are drawn at the 50% probability. Symmetry codes of # and \* are  $(1 - x, 1 - y, 1 - z)$  and  $(1 - x, y, 1/2 - z)$ , respectively.

**Table S1.** Selected Crystallographic data of *trans*- and *cis*-**4**.

| Complex                                                                  | <i>trans</i> - <b>4</b>                                        | <i>cis</i> - <b>4</b>                                          |
|--------------------------------------------------------------------------|----------------------------------------------------------------|----------------------------------------------------------------|
| Formula                                                                  | C <sub>8</sub> H <sub>14</sub> N <sub>4</sub> NiO <sub>8</sub> | C <sub>8</sub> H <sub>14</sub> N <sub>4</sub> NiO <sub>8</sub> |
| Formula weight                                                           | 352.94                                                         | 352.94                                                         |
| Dimension /mm <sup>3</sup>                                               | 0.210×0.151×0.117                                              | 0.102×0.083×0.067                                              |
| <i>T</i> / K                                                             | 299                                                            | 300                                                            |
| Crystal system                                                           | orthorhombic                                                   | monoclinic                                                     |
| Space group                                                              | <i>Pbca</i>                                                    | <i>C2/c</i>                                                    |
| <i>a</i> /Å                                                              | 6.7762(3)                                                      | 12.6240(6)                                                     |
| <i>b</i> /Å                                                              | 13.2851(6)                                                     | 7.3667(3)                                                      |
| <i>c</i> /Å                                                              | 14.2804(6)                                                     | 13.8231(6)                                                     |
| $\beta$ /°                                                               | 90                                                             | 103.215(4)                                                     |
| <i>V</i> /Å <sup>3</sup>                                                 | 1285.56(10)                                                    | 1251.47(10)                                                    |
| <i>Z</i>                                                                 | 4                                                              | 4                                                              |
| <i>D</i> <sub>calc</sub> /g cm <sup>-3</sup>                             | 1.824                                                          | 1.873                                                          |
| Unique data                                                              | 1819                                                           | 1706                                                           |
| $\mu$ (MoK $\alpha$ ) /mm <sup>-1</sup>                                  | 1.559                                                          | 1.601                                                          |
| <i>R</i> ( <i>F</i> ) <sup>a</sup> ( <i>I</i> > 2 $\sigma$ ( <i>I</i> )) | 0.0289                                                         | 0.0332                                                         |
| <i>R</i> <sub>w</sub> ( <i>F</i> <sup>2</sup> ) <sup>b</sup> (all data)  | 0.0828                                                         | 0.0944                                                         |
| Goodness-of-fit                                                          | 1.063                                                          | 1.094                                                          |
| CCDC reference                                                           | 2435384                                                        | 2435385                                                        |

a)  $R = \sum ||F_o| - |F_c|| / \sum |F_o|$ .

b)  $R_w = [\sum w|F_o^2 - F_c^2|^2 / \sum w(F_o^2)^2]^{1/2}$ .

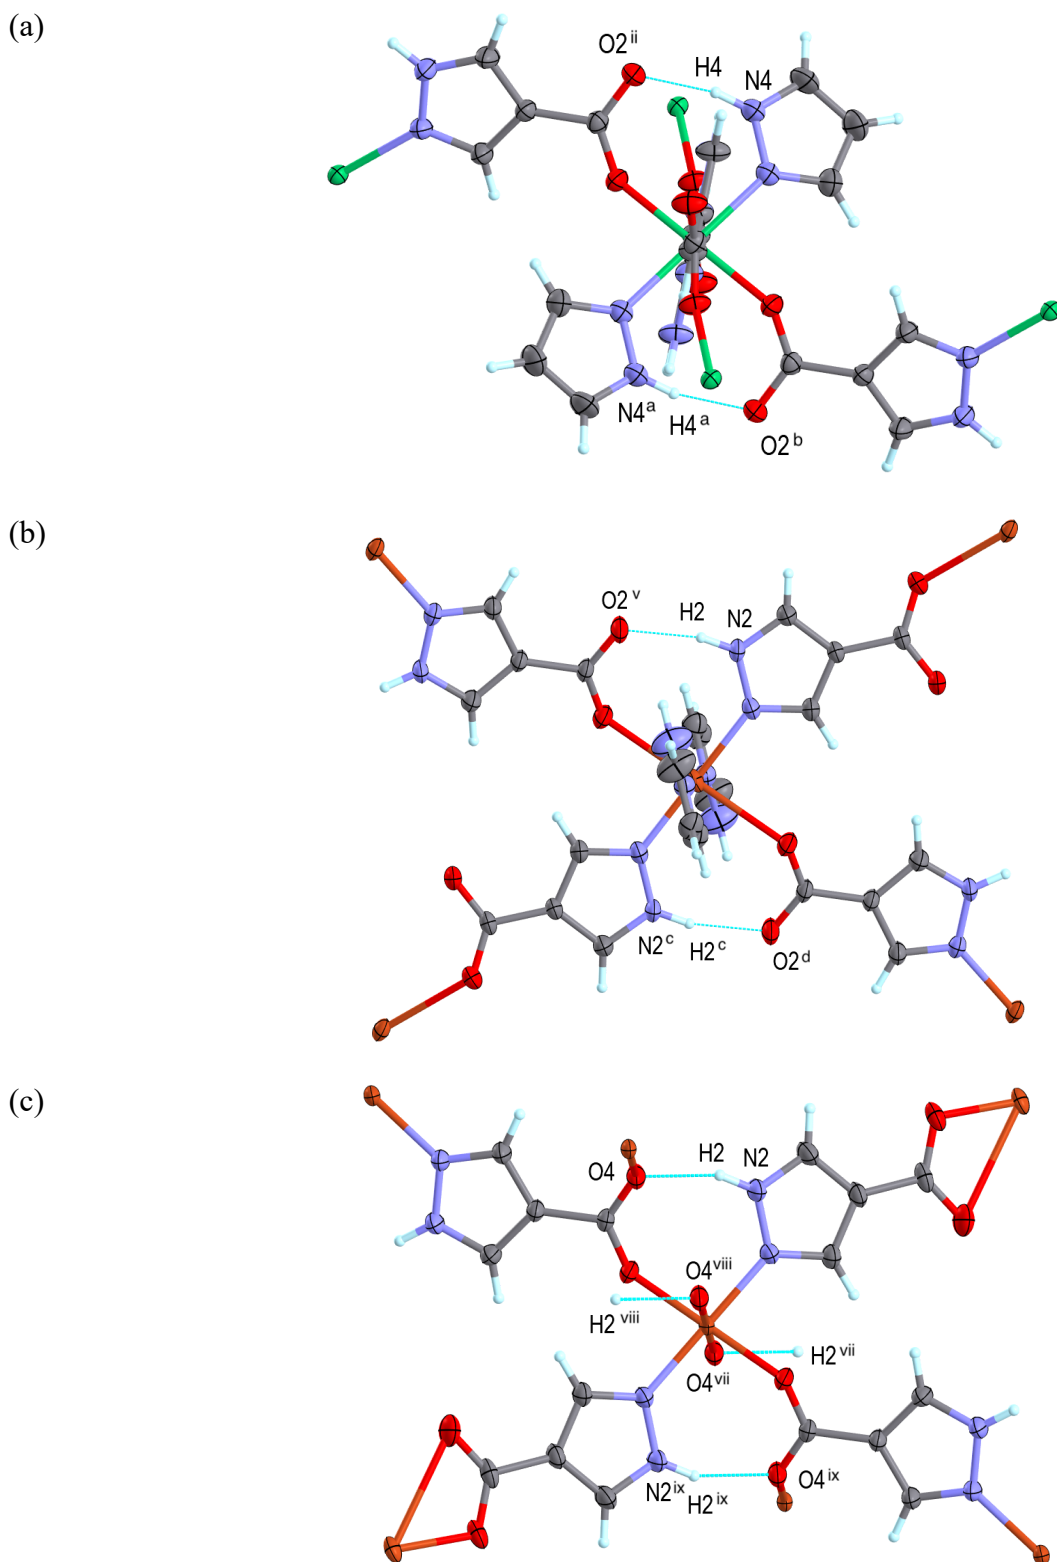

**Figure S3.** Hydrogen bonding structures of (a) **1**, (b) **2**, and (c) **3**. Hydrogen bonds are shown with dotted lines. Symmetry related hydrogen bonds are also shown. Symmetry operation codes for a, b, c, and d are  $(1-x, 1-y, 1-z)$ ,  $(1-x, -1/2+y, 1/2-z)$ ,  $(3/2-x, 3/2-y, 3/2-z)$ , and  $(1-x, 1/2+y, 3/2-z)$ , respectively. For other symmetry codes, see the main text.

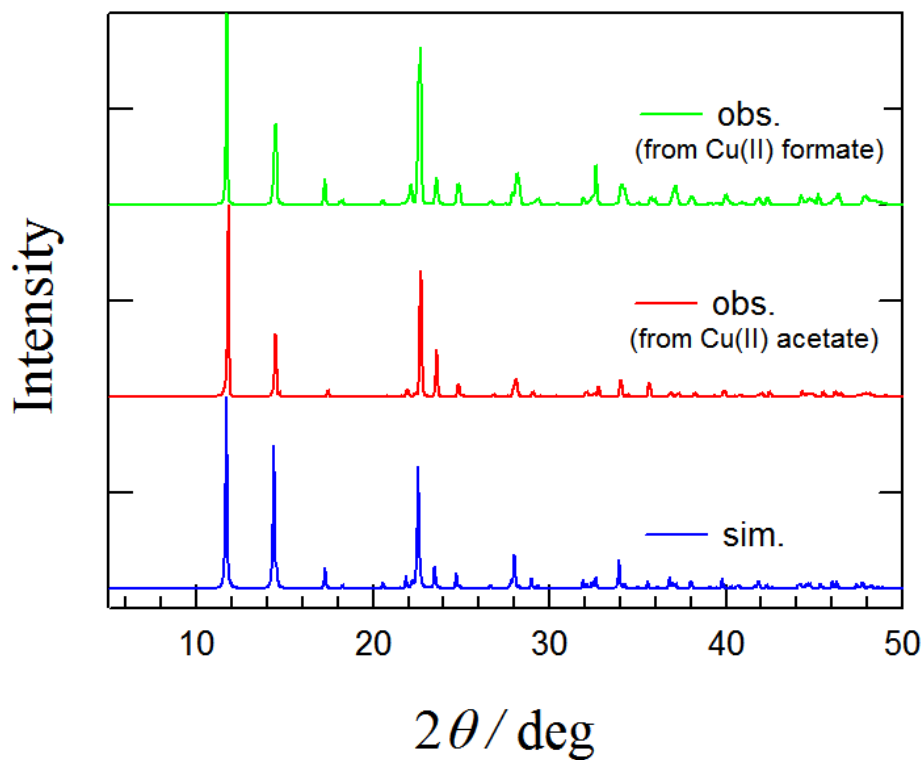

**Figure S4.** Powder XRD profiles for **3**. Color codes: observed for the sample prepared from copper(II) formate, green; observed for the sample prepared from copper(II) acetate, red; simulation from the single crystal crystallographic analysis at 100 K for the sample prepared from copper(II) acetate, blue.
